# Supplementary material
Source: PubMed Central journal article supplement (PMC6996266)
Supplement: NIHMS1548819-supplement-1.pdf [file NIHMS1548819-supplement-1.pdf]

Supplemental Table 1. Patient-level characteristics of patients with a cracked tooth treated at baseline, overall and according to whether or not internal cracks were also present

| Demographic characteristic              | (N=435)        |                   | Internal cracks<br>YES (=389) |                    |
|-----------------------------------------|----------------|-------------------|-------------------------------|--------------------|
|                                         | N <sup>1</sup> | CoI% <sup>2</sup> | N                             | Row % <sup>3</sup> |
| <u>Gender</u>                           |                |                   |                               |                    |
| Female                                  | 266            | 61%               | 244                           | 92%                |
| Male                                    | 169            | 39%               | 145                           | 86%                |
| <i>cluster adjusted OR</i>              |                |                   | 1.9                           |                    |
| <i>cluster adjusted p<sup>4</sup></i>   |                |                   | 0.048                         |                    |
| <u>Race<sup>5</sup>-ethnicity</u>       |                |                   |                               |                    |
| White                                   | 365            | 85%               | 325                           | 89%                |
| Black                                   | 25             | 6%                | 22                            | 88%                |
| Asian                                   | 6              | 1%                | 6                             | 100%               |
| Hispanic                                | 27             | 6%                | 25                            | 93%                |
| Other                                   | 4              | 1%                | 4                             | 100%               |
| <i>cluster adjusted p</i>               |                |                   | non-estimable                 |                    |
| <u>Age (years)</u>                      |                |                   |                               |                    |
| < 35                                    | 31             | 7%                | 27                            | 87%                |
| 35 - 44                                 | 85             | 20%               | 77                            | 91%                |
| 45 - 54                                 | 121            | 28%               | 114                           | 94%                |
| 55 - 64                                 | 138            | 32%               | 117                           | 85%                |
| 65 and older                            | 60             | 14%               | 54                            | 90%                |
| <i>cluster adjusted p</i>               |                |                   | 0.5                           |                    |
| <u>Dental insurance</u>                 |                |                   |                               |                    |
| None                                    | 66             | 15%               | 57                            | 86%                |
| Any                                     | 369            | 85%               | 332                           | 90%                |
| <i>cluster adjusted OR</i>              |                |                   | 1.31                          |                    |
| <i>cluster adjusted p</i>               |                |                   | 0.5                           |                    |
| <u>Education</u>                        |                |                   |                               |                    |
| <= High school                          | 48             | 11%               | 44                            | 92%                |
| Some college/Associate                  | 118            | 27%               | 105                           | 89%                |
| Bachelor                                | 156            | 36%               | 142                           | 91%                |
| Graduate degree                         | 110            | 25%               | 95                            | 86%                |
| <i>cluster adjusted p</i>               |                |                   | 0.3                           |                    |
| <u>Clench, grind, or press on teeth</u> |                |                   |                               |                    |
| No                                      | 142            | 33%               | 128                           | 90%                |
| Yes                                     | 293            | 67%               | 261                           | 89%                |
| <i>cluster adjusted OR</i>              |                |                   | 0.9                           |                    |
| <i>cluster adjusted p</i>               |                |                   | 0.8                           |                    |
| <u>Region</u>                           |                |                   |                               |                    |
| Western                                 | 72             | 17%               | 66                            | 92%                |
| Midwest                                 | 88             | 20%               | 81                            | 92%                |
| Southwest                               | 70             | 16%               | 63                            | 90%                |
| South Central                           | 88             | 20%               | 79                            | 90%                |
| South Atlantic                          | 48             | 11%               | 37                            | 77%                |
| Northeast                               | 69             | 16%               | 63                            | 91%                |
| <i>cluster adjusted p</i>               |                |                   | 0.4                           |                    |

|                                      |     |     |       |     |
|--------------------------------------|-----|-----|-------|-----|
| South Atlantic                       | 48  | 11% | 37    | 77% |
| All other regions                    | 387 | 89% | 352   | 91% |
| <i>cluster adjusted OR</i>           |     |     | 0.3   |     |
| <i>cluster adjusted p</i>            |     |     | 0.04  |     |
| <u>Any symptoms/pain<sup>6</sup></u> |     |     |       |     |
| No                                   | 137 | 31% | 116   | 85% |
| Yes                                  | 298 | 69% | 273   | 92% |
| <i>cluster adjusted OR</i>           |     |     | 2.0   |     |
| <i>cluster adjusted p</i>            |     |     | 0.03  |     |
| <u>Cold pain</u>                     |     |     |       |     |
| No                                   | 205 | 47% | 180   | 88% |
| Yes                                  | 230 | 53% | 209   | 91% |
| <i>cluster adjusted OR</i>           |     |     | 1.5   |     |
| <i>cluster adjusted p</i>            |     |     | 0.2   |     |
| <u>Biting pain</u>                   |     |     |       |     |
| No                                   | 272 | 63% | 235   | 86% |
| Yes                                  | 163 | 37% | 154   | 94% |
| <i>cluster adjusted OR</i>           |     |     | 2.6   |     |
| <i>cluster adjusted p</i>            |     |     | 0.002 |     |
| <u>Spontaneous pain</u>              |     |     |       |     |
| No                                   | 322 | 74% | 286   | 89% |
| Yes                                  | 113 | 26% | 103   | 91% |
| <i>cluster adjusted OR</i>           |     |     | 1.2   |     |
| <i>cluster adjusted p</i>            |     |     | 0.6   |     |

<sup>1</sup>Column Ns not summing to column total N above due to missing data

<sup>2</sup>Column percentages not summing to 100 due to rounding.

<sup>3</sup>Percent symptomatic within level of demographic characteristic.

<sup>4</sup>Significance of differences in proportions with an internal crack, adjusted only for clustering of patients within practitioner using generalized estimating equations.

<sup>5</sup>Race groups are all non-Hispanic

<sup>6</sup>Can have more than 1 type of pain

Supplemental Table 2. Tooth-level characteristics of patients with a cracked tooth treated at baseline, overall and according to whether or not internal cracks were also present

| Tooth-level characteristic <sup>1</sup> | (N=435)                                |                   | Internal cracks<br>YES (=389) |                    |
|-----------------------------------------|----------------------------------------|-------------------|-------------------------------|--------------------|
|                                         | N <sup>1</sup>                         | Col% <sup>2</sup> | N                             | Row % <sup>3</sup> |
| Molar                                   | 368                                    | 85%               | 329                           | 89%                |
| Premolar                                | 67                                     | 15%               | 60                            | 90%                |
|                                         | <i>cluster adjusted OR<sup>5</sup></i> |                   |                               | 1.0                |
|                                         | <i>cluster adjusted p<sup>5</sup></i>  |                   |                               | 0.97               |
| Mandibular                              | 233                                    | 54%               | 208                           | 89%                |
| Maxillary                               | 202                                    | 46%               | 181                           | 90%                |
|                                         | <i>cluster adjusted OR</i>             |                   |                               | 1.0                |
|                                         | <i>cluster adjusted p</i>              |                   |                               | 0.92               |
| 2 or more restorations present          | 73                                     | 17%               | 65                            | 89%                |
| 0 or 1 restoration present              | 362                                    | 83%               | 324                           | 90%                |
|                                         | <i>cluster adjusted OR</i>             |                   |                               | 0.9                |
|                                         | <i>cluster adjusted p</i>              |                   |                               | 0.82               |
| 2 or more external cracks               | 286                                    | 66%               | 254                           | 89%                |
| 1 external crack                        | 149                                    | 34%               | 135                           | 91%                |
|                                         | <i>cluster adjusted OR</i>             |                   |                               | 0.9                |
|                                         | <i>cluster adjusted p</i>              |                   |                               | 0.7                |
| In occlusion w/opposing tooth           | 427                                    | 98%               | 382                           | 89%                |
| Not in occlusion w/opposing tooth       | 8                                      | 2%                | 7                             | 88%                |
|                                         | <i>cluster adjusted OR</i>             |                   |                               | 1.2                |
|                                         | <i>cluster adjusted p</i>              |                   |                               | 0.8                |
| Wear facet through enamel               | 113                                    | 26%               | 98                            | 87%                |
| No wear facet through enamel            | 322                                    | 74%               | 291                           | 90%                |
|                                         | <i>cluster adjusted OR</i>             |                   |                               | 0.7                |
|                                         | <i>cluster adjusted p</i>              |                   |                               | 0.2                |
| Exposed roots                           | 68                                     | 16%               | 61                            | 90%                |
| No exposed roots                        | 367                                    | 84%               | 328                           | 89%                |
|                                         | <i>cluster adjusted OR</i>             |                   |                               | 1.0                |
|                                         | <i>cluster adjusted p</i>              |                   |                               | 0.96               |
| Caries present                          | 155                                    | 36%               | 131                           | 85%                |
| No caries present                       | 280                                    | 64%               | 258                           | 92%                |
|                                         | <i>cluster adjusted OR</i>             |                   |                               | 0.50               |

|                                        |     |     |     |                            |             |
|----------------------------------------|-----|-----|-----|----------------------------|-------------|
|                                        |     |     |     | <i>cluster adjusted p</i>  | <i>0.04</i> |
| NCCL present                           | 30  | 7%  | 27  | 90%                        |             |
| No NCCL present                        | 405 | 93% | 362 | 89%                        |             |
|                                        |     |     |     | <i>cluster adjusted OR</i> | <i>1.1</i>  |
|                                        |     |     |     | <i>cluster adjusted p</i>  | <i>0.85</i> |
| Natural or restored opposing tooth     | 385 | 89% | 342 | 89%                        |             |
| Not natural or restored opposing tooth | 50  | 11% | 47  | 94%                        |             |
|                                        |     |     |     | <i>cluster adjusted OR</i> | <i>0.4</i>  |
|                                        |     |     |     | <i>cluster adjusted p</i>  | <i>0.06</i> |
| Evidence of crack(s) on radiograph     | 21  | 5%  | 20  | 95%                        |             |
| No evidence of crack(s) on radiograph  | 414 | 95% | 369 | 89%                        |             |
|                                        |     |     |     | <i>cluster adjusted OR</i> | <i>3.7</i>  |
|                                        |     |     |     | <i>cluster adjusted p</i>  | <i>0.2</i>  |

<sup>1</sup>NCCL: Non-carious cervical lesion

<sup>2</sup>Column Ns not summing to column total N above due to missing data

<sup>3</sup>Column percents not summing to 100 due to rounding.

<sup>4</sup>Percent symptomatic within level of tooth characteristic.

<sup>5</sup>Significance of differences in proportions with an internal crack, adjusted only for clustering of patients within practitioner using generalized estimating equations.

Supplemental Table 3. Crack-level characteristics of patients with a cracked tooth treated at baseline overall and according to whether or not internal cracks were also present

| External crack-level characteristics            | (N=435)        |                   | Internal cracks<br>YES (=389)          |                    |
|-------------------------------------------------|----------------|-------------------|----------------------------------------|--------------------|
|                                                 | N <sup>1</sup> | Col% <sup>2</sup> | N                                      | Row % <sup>3</sup> |
| At least 1 crack stained                        | 360            | 83%               | 323                                    | 90%                |
| No cracks were stained                          | 75             | 17%               | 66                                     | 88%                |
|                                                 |                |                   | <i>cluster adjusted OR<sup>4</sup></i> | 1.3                |
|                                                 |                |                   | <i>cluster adjusted p<sup>4</sup></i>  | 0.6                |
| At least 1 crack detectable with explorer       | 316            | 73%               | 283                                    | 90%                |
| No cracks were detectable with explorer         | 119            | 27%               | 106                                    | 89%                |
|                                                 |                |                   | <i>cluster adjusted OR</i>             | 1.1                |
|                                                 |                |                   | <i>cluster adjusted p</i>              | 0.8                |
| At least 1 crack blocked transilluminated light | 297            | 68%               | 270                                    | 91%                |
| No cracks blocked transilluminated light        | 138            | 32%               | 119                                    | 86%                |
|                                                 |                |                   | <i>cluster adjusted OR</i>             | 1.8                |
|                                                 |                |                   | <i>cluster adjusted p</i>              | 0.08               |
| At least 1 crack connected with a restoration   | 325            | 75%               | 297                                    | 91%                |
| No cracks connected with a restoration          | 110            | 25%               | 92                                     | 84%                |
|                                                 |                |                   | <i>cluster adjusted OR</i>             | 2.2                |
|                                                 |                |                   | <i>cluster adjusted p</i>              | 0.04               |
| At least 1 crack connected with another crack   | 28             | 6%                | 26                                     | 93%                |
| No cracks connected with another crack          | 407            | 94%               | 363                                    | 89%                |
|                                                 |                |                   | <i>cluster adjusted OR</i>             | 1.6                |
|                                                 |                |                   | <i>cluster adjusted p</i>              | 0.4                |
| At least 1 crack extended to root               | 37             | 9%                | 34                                     | 92%                |
| No cracks extended to root                      | 398            | 91%               | 355                                    | 89%                |
|                                                 |                |                   | <i>cluster adjusted OR</i>             | 1.5                |
|                                                 |                |                   | <i>cluster adjusted p</i>              | 0.5                |
| At least 1 crack in horizontal direction        | 156            | 36%               | 142                                    | 91%                |
| No cracks in horizontal direction               | 279            | 64%               | 247                                    | 89%                |
|                                                 |                |                   | <i>cluster adjusted OR</i>             | 1.3                |
|                                                 |                |                   | <i>cluster adjusted p</i>              | 0.5                |
| At least 1 crack in vertical direction          | 407            | 94%               | 364                                    | 89%                |
| No cracks in vertical direction                 | 28             | 6%                | 25                                     | 89%                |
|                                                 |                |                   | <i>cluster adjusted OR</i>             | 1.1                |
|                                                 |                |                   | <i>cluster adjusted p</i>              | 0.9                |

|                                               |     |     |     |      |
|-----------------------------------------------|-----|-----|-----|------|
| At least 1 crack in oblique direction         | 30  | 7%  | 29  | 97%  |
| No cracks in oblique direction                | 405 | 93% | 360 | 89%  |
| <i>cluster adjusted OR</i>                    |     |     |     | 3.1  |
| <i>cluster adjusted p</i>                     |     |     |     | 0.08 |
| Cracks are in more than 1 direction           | 74  | 17% | 69  | 93%  |
| All cracks in same direction                  | 361 | 83% | 320 | 89%  |
| <i>cluster adjusted OR</i>                    |     |     |     | 1.8  |
| <i>cluster adjusted p</i>                     |     |     |     | 0.2  |
| <u>Surfaces involved</u>                      |     |     |     |      |
| At least 1 crack involved mesial              | 233 | 54% | 208 | 89%  |
| No crack involved mesial                      | 202 | 46% | 181 | 90%  |
| <i>cluster adjusted OR</i>                    |     |     |     | 1.0  |
| <i>cluster adjusted p</i>                     |     |     |     | 0.9  |
| At least 1 crack involved occlusal            | 222 | 51% | 206 | 93%  |
| No crack involved occlusal                    | 213 | 49% | 183 | 86%  |
| <i>cluster adjusted OR</i>                    |     |     |     | 2.3  |
| <i>cluster adjusted p</i>                     |     |     |     | 0.02 |
| At least 1 crack involved distal              | 238 | 55% | 217 | 91%  |
| No crack involved distal                      | 197 | 45% | 172 | 87%  |
| <i>cluster adjusted OR</i>                    |     |     |     | 1.6  |
| <i>cluster adjusted p</i>                     |     |     |     | 0.14 |
| At least 1 crack involved facial              | 177 | 41% | 158 | 89%  |
| No crack involved facial                      | 258 | 59% | 231 | 90%  |
| <i>cluster adjusted OR</i>                    |     |     |     | 1.0  |
| <i>cluster adjusted p</i>                     |     |     |     | 0.9  |
| At least 1 crack involved lingual             | 225 | 52% | 208 | 92%  |
| No crack involved lingual                     | 210 | 48% | 181 | 86%  |
| <i>cluster adjusted OR</i>                    |     |     |     | 2.0  |
| <i>cluster adjusted p</i>                     |     |     |     | 0.07 |
| At least 1 crack involved more than 1 surface | 183 | 42% | 170 | 93%  |
| No crack involved more than 1 surface         | 252 | 58% | 219 | 87%  |
| <i>cluster adjusted OR</i>                    |     |     |     | 2.2  |
| <i>cluster adjusted p</i>                     |     |     |     | 0.03 |

<sup>1</sup>Column Ns not summing to column total N above due to missing data

<sup>2</sup>Column percents not summing to 100 due to rounding.

<sup>3</sup>Percent symptomatic within level of crack characteristic.

<sup>4</sup>Significance of differences in proportions with an internal crack, adjusted only for clustering of patients within practitioner using generalized estimating equations.
